# Supplementary material for: High performance Pt/Ti3O5Mo0.2Si0.4 electrocatalyst with outstanding methanol oxidation activity
Source: Royal Society of Chemistry journal article supplement (doi:10.1039/c9cy00704k), 2019-01-01
Supplement: c9cy00704k1.pdf [file c9cy00704k1.pdf]

Supplementary Information

**High Performance Pt/Ti<sub>3</sub>O<sub>5</sub>Mo<sub>0.2</sub>Si<sub>0.4</sub> Electrocatalyst with Outstanding Methanol Oxidation Activity**

Reza Alipour Moghadam Esfahani<sup>†</sup>, Reza B. Moghaddam, E. Bradley Easton\*

*Electrochemical Materials Lab, Faculty of Science, University of Ontario Institute of Technology, 2000 Simcoe Street North, Oshawa, ON, L1G 0C5 Canada*

\*Corresponding author: [brad.easton@uoit.ca](mailto:brad.easton@uoit.ca) <sup>†</sup> Email: [reza.alipour@uoit.ca](mailto:reza.alipour@uoit.ca)

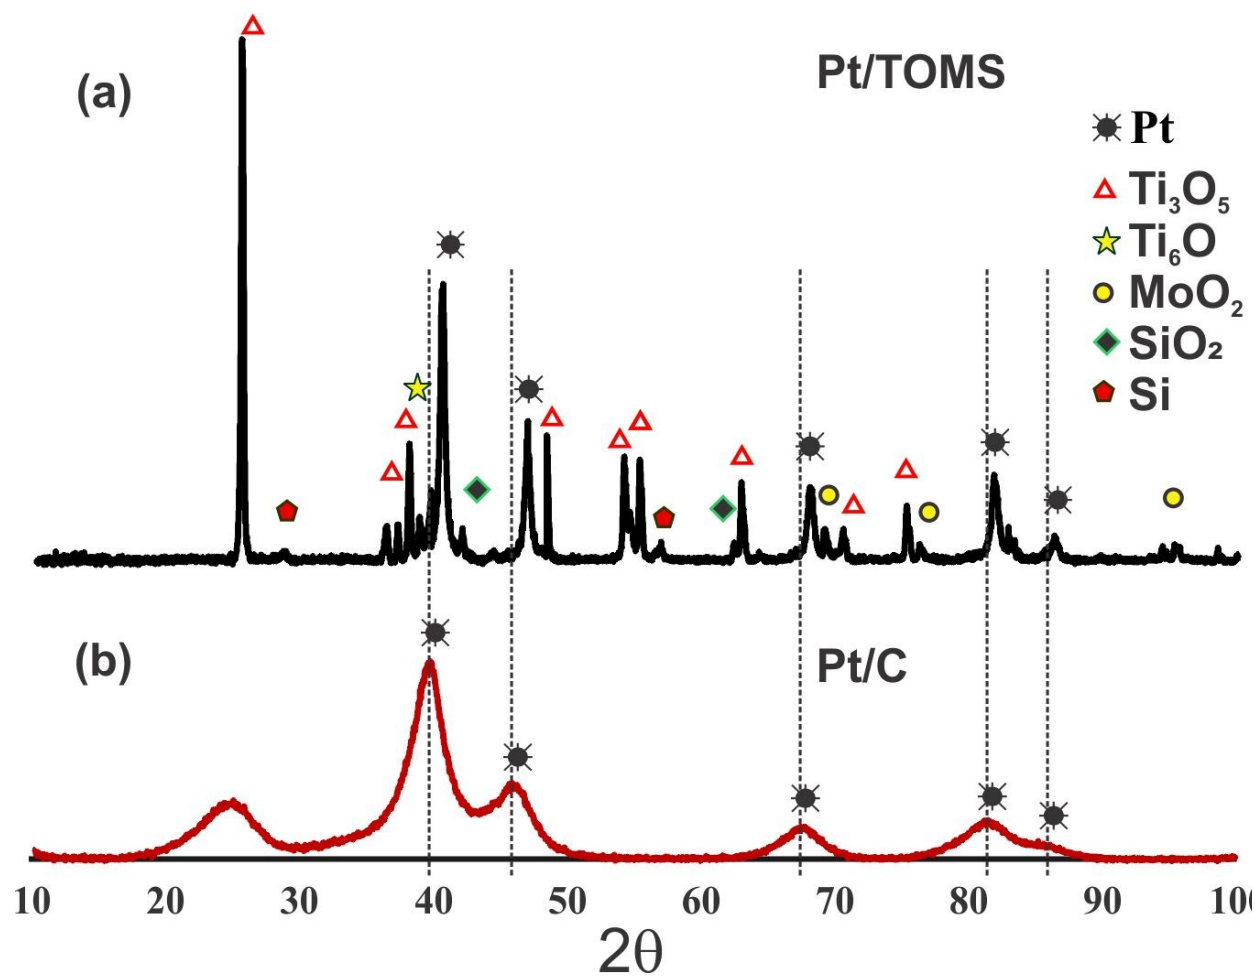

Fig. S1. The X-ray diffraction patterns obtained for the Pt/TOMS and Pt/C catalysts.

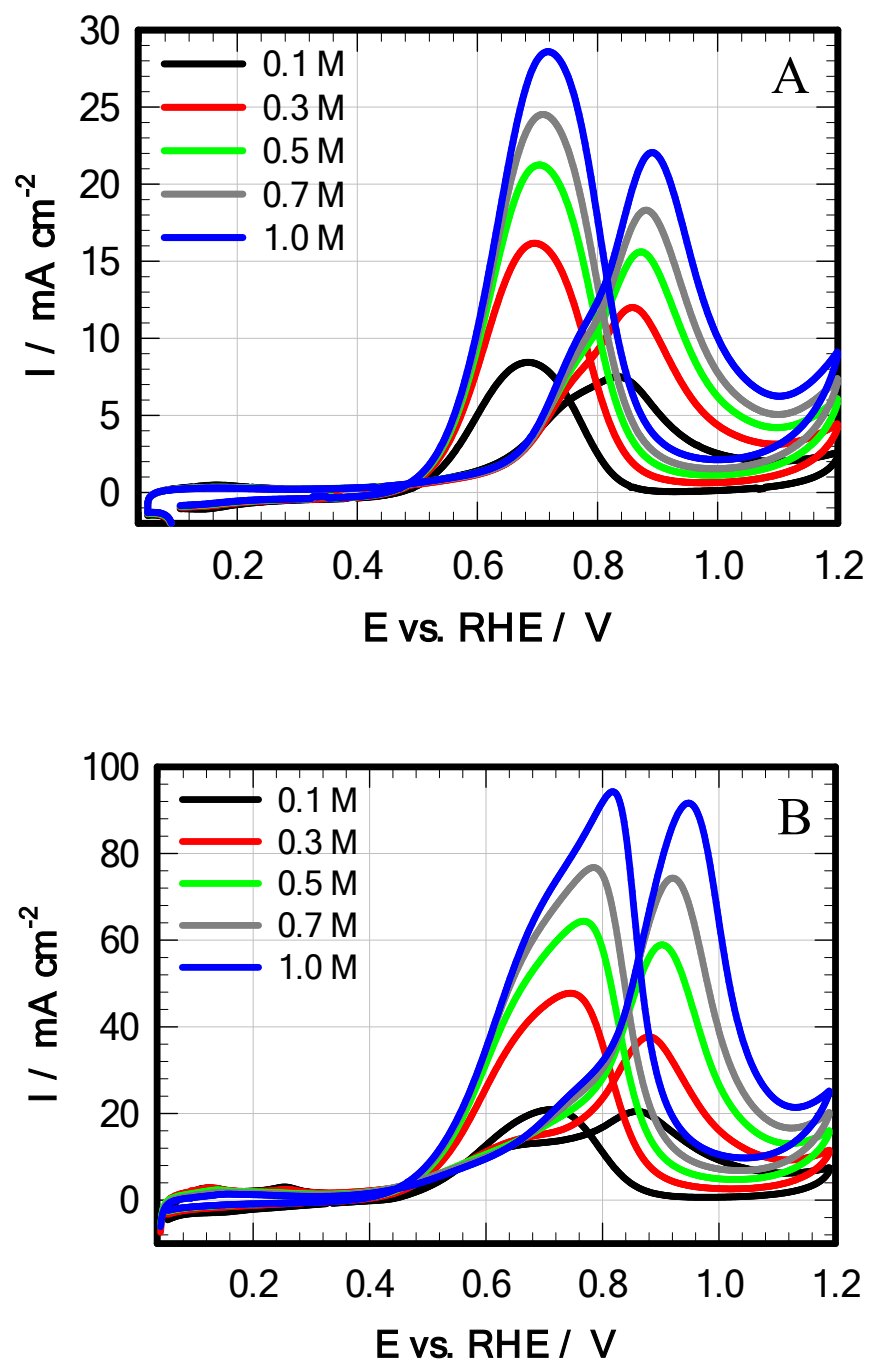

Fig. S2. Methanol oxidation in  $0.5 \text{ M H}_2\text{SO}_4$  as a function of methanol concentration at room temperature ( $\square 20^\circ \text{C}$ ). Potential sweep rate was  $20 \text{ mV s}^{-1}$ .

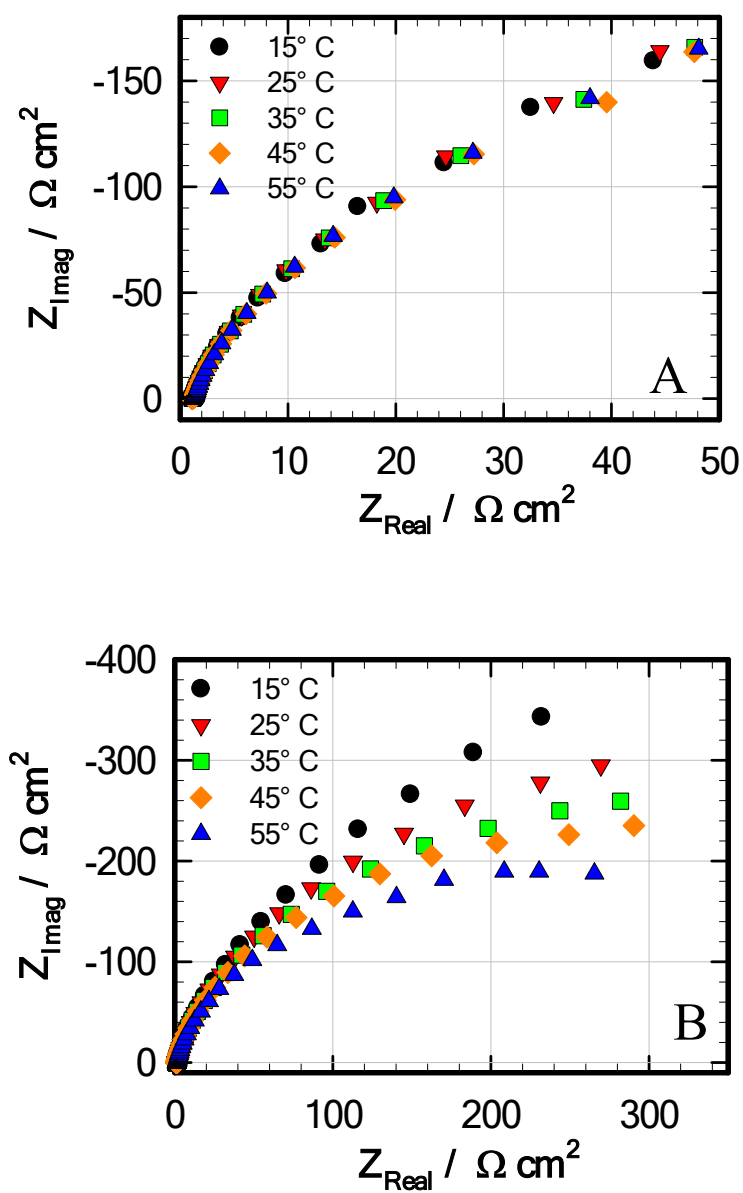

Fig. S3. Nyquist plots (100 kHz – 0.1 Hz; dc bias potential = 0.4 V<sub>RHE</sub>) for methanol oxidation over Pt/C (A) and Pt/TOMS (B) in 0.5 M H<sub>2</sub>SO<sub>4</sub> as a function of methanol concentration at room temperature (□20°C).

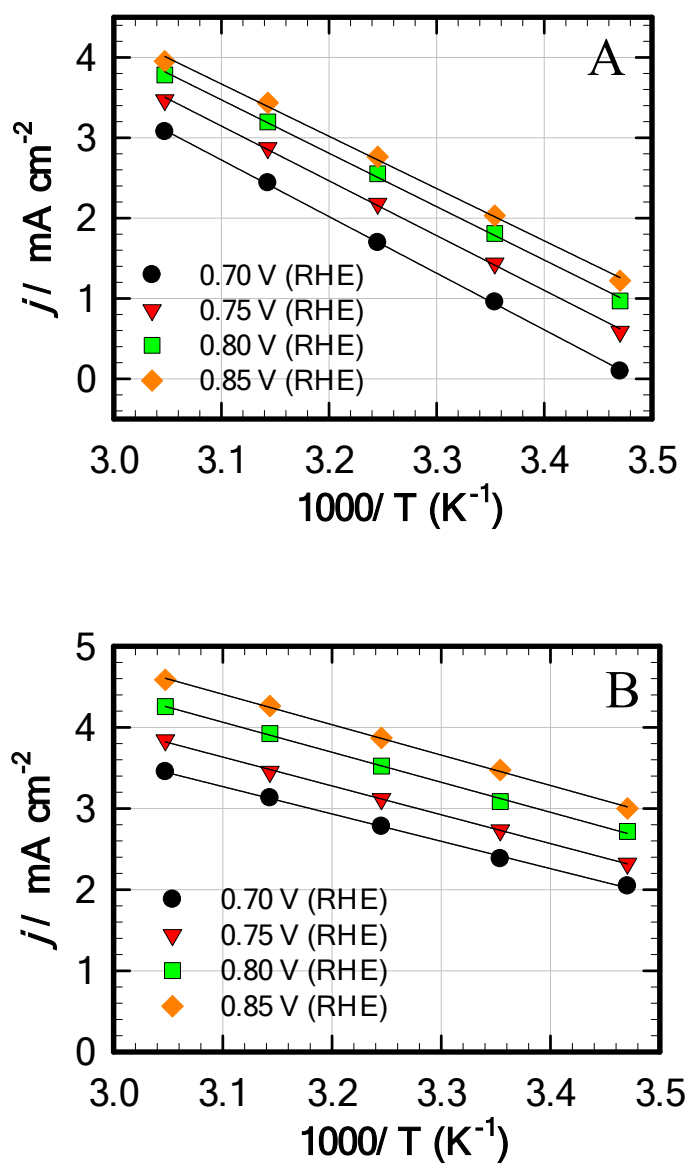

Fig. S4. Arrhenius plots for methanol oxidation (0.5 M) over Pt/C (A) and Pt/TOMS (B) at the temperature range of 70 to 85°C.
